# Supplementary material
Source: PubMed Central journal article supplement (PMC2798317)
Supplement: tpc.109.069088_1.pdf [file tpc.109.069088_1.pdf]

Supplemental Figure 1. FASTA format multiple alignment of 32 *Arabidopsis* B-box proteins aligned with MUSCLE (Edgar, 2004). B-box B1, B-box B2, and CCT domains are labeled.

AT1G60250 ----- MAQVC HTC-RHVTAV IHCVTEALNF  
 AT1G49130 ----- MTSHQNIK ISEKIMISKY QEDVKQPRAC ELC-LNKHAV WYCASDDAFL  
 AT1G73870 ----- MV VDVESRTASV TGEKMAARGC DACMKRSRAS WYCPADDAFL  
 AT1G25440 ----- MMKSLAN AVGAKTARAC DSC-VKRRAR WYCAADDAFL  
 AT1G68520 ----- MMKSLAS AVGGKTARAC DSC-VKRRAR WYCAADDAFL  
 AT3G07650 ----- MGYMC DFC-GEQRSM VYCRSDAACL  
 AT5G48250 ----- MGYMC DFC-GEQRSM VYCRSDAACL  
 AT3G21880 ----- MEPKC DHC-ATSQAL IYCKSDLAKL  
 AT4G15250 ----- MEARC DFC-GTEKAL IYCKSDSAKL  
 AT2G47890 ----- MEA EEGHQDRRLC DYD-DSSVAL VYCKADSAKL  
 AT1G28050 ----- M----- M----- DFC-GERTAV LFCRADTAKL  
 AT2G33500 ----- MG TSTTESVVC EFC-GERTAV LFCRADTAKL  
 AT1G68190 ----- MLCI I I I ENMERVC EFC-KAYRAV VYCIADTANL  
 AT3G21150 ----- MVSFC ELC-GAEAD LHCAADSAFL  
 AT5G15840 ----- MLKQESNDIG SGENNRARPC DTC-RSNACT VYCHADSAYL  
 AT3G02380 ----- MLKEES NESGTWARAC DTC-RSAACT VYCEADSAYL  
 AT5G15850 ----- ML KVESNWAQAC DTC-RSAACT VYCRADSAYL  
 AT5G57660 ----- MG FGLESIKSI GGGWAAAARS DAC-KSVTAA VFCDVSAFL  
 AT2G24790 ----- MASSSRLC DSC-KSTAAT LFCRADAFL  
 AT5G24930 MDPTWIDSLT RSCEANSNTN HKRKRERETL KHREKKKKRF RERKMASKLC DSC-KSATAA LYCRPDAAFL  
 AT4G27310 ----- MGKKC DLC-NGVAR MYCESDQASL  
 AT5G54470 ----- MGKKKC ELC-CGVAR MYCESDQASL  
 AT3G21890 ----- MC RGL-NNEESR RSDGGGCRSL  
 AT4G15248 ----- MC RGF-EKEEER RSDNNGCQRL  
 AT1G75540 ----- MKIRC DVC-DKEEAS VFCTADEASL  
 AT4G39070 ----- MKIWC AVC-DKEEAS VFCCADEAAL  
 AT1G06040 ----- MKIQC DVC-EKAPAT VICCADEAAL  
 AT2G31380 ----- MKIQC DVC-EKAPAT LICCADEAAL  
 AT2G21320 ----- MRILC DAC-ESAAAI VFCAADEAAL  
 AT4G38960 ----- MRILC DAC-ENAAAI IFCAADEAAL  
 AT4G10240 ----- MKIQC EVC-EKAEAE VLCCSDEAVL  
 AT1G78600 ----- MKIQC NVC-EAAEAT VLCCADEAAL

## B-box B1

71  
 AT1G60250 CLTCDNLRHH -NNIHAEHVR YQL----- CD NCSMYP SILF ----- CYEDGMV  
 AT1G49130 CHVCDES VHS ANHVATKHER VCL----- R TNEISNDVRG GTTLTSVWHS GFRRKARTPR SRYEKKPQOK  
 AT1G73870 QSCDAS IHS ANHLAKRHER VRL----- QSSSPTET ADKTTSVWYE GFRRKARTPR SKSCAFEKLL  
 AT1G25440 CQSCD SIVHS ANPLARRHER VRLKTASPAV VKHSNHSSAS PPHEVATWHH GFTRKARTPR GSGKKNSS I  
 AT1G68520 CHACDGS VHS ANPLARRHER VRL----- KS ASAGKYRHAS PPHQ-ATWHQ GFTRKARTPR G-GKKSHTMV  
 AT3G07650 CLSCDR S VHS ANALSKRHSR TLV----- CE RCNAQPATVR ----- CVEERVS  
 AT5G48250 CLSCDR N VHS ANALSKRHSR TLV----- CE RCNAQPASVR ----- CSDERSV  
 AT3G21880 CLNCDV H VHS ANPLSHRHIR SLI----- CE KCFSQPAAIR ----- CLDEKVS  
 AT4G15250 CLNCDV N VHS ANPLSORHTR SLL----- CE KCSLOPTAVH ----- CMENVS  
 AT2G47890 CLACDKQ VHV ANQLFAKHFR SLL----- CD SCNESPSSLF ----- CETERSV  
 AT1G28050 CLPCDQ QVHT ANLLSRKHVR SQI----- CD NCGNEPVSVR ----- CFTDNL I  
 AT2G33500 CLPCDQ H VHS ANLLSRKHVR SQI----- CD NCSKEPVSVR ----- CFTDNL V  
 AT1G68190 CLTCD A VHS ANSLSGRHLR TVL----- CD SCKNQPCVVR ----- CFDHKMF  
 AT3G21150 CRSCDA K FHA SNFLFARHFR RVI----- CP NCKSLTQNFV SGPLLPWPPR TTCSESSSS  
 AT5G15840 CMSCDA Q VHS ANRVASRHKR VRV----- CE SCERAPAAFL ----- CEADAS  
 AT3G02380 CTTCDAR VHA ANRVASRHER VRV----- CQ SCESAPAAFL ----- CKADAAS  
 AT5G15850 CSSCDA Q VHA ANRLASRHER VRV----- CQ SCERAPAAFF ----- CKADAAS  
 AT5G57660 CIACDTR IHS ----- FTRHER VWV----- CE VCEQAPAAVT ----- CKADAAA  
 AT2G24790 CGDCD GKIHT ANKLASRHER VWL----- CE VCEQAPAHVT ----- CKADAAA  
 AT5G24930 CLSCD S KVHA ANKLASRHR VWM----- CE VCEQAPAHVT ----- CKADAAA  
 AT4G27310 CWDCD GKVHG ANFLVAKHTR CLL----- CE ACQSLTPWKA ----- TGLRLGP  
 AT5G54470 CWDCD GKVHG ANFLVAKHMR CLL----- CS ACQSHTPWKA ----- SGLNLGP  
 AT3G21890 CTRPSV PVR ----- CE LCDGDAS-VF ----- CEADSAF  
 AT4G15248 CTESHKAP VS ----- CE LCGENAT-VY ----- CEADAAF  
 AT1G75540 CGGCDH QVHH ANKLASKHLR FSL----- LYPS SSNTSSPLCD ICQDKKALF ----- CQQDRAI  
 AT4G39070 CNGCDR HVHF ANKLAGKHLR FSL----- TS PTFKDAPLCD ICGERRALLF ----- CQEDRAI  
 AT1G06040 CQCDIE IHA ANKLASKHOR LHL----- N SLSTKFPCCD ICQEKAAFIF ----- CVEDRAL  
 AT2G31380 CAKCDVE VHA ANKLASKHOR LFL----- D SLSTKFPCCD ICLEKAAFIF ----- CVEDRAL  
 AT2G21320 CCSCDEK VHK CNKLASRHLR VGL----- ADPSNAPSCD ICENAPAFFY ----- CEIDGSS  
 AT4G38960 CRPCDEK VHM CNKLASRHRV VGL----- AEPNAPCCD ICENAPAFFY ----- CEIDGSS  
 AT4G10240 CKPCD IKVHE ANKLFQRHHR VALQKDAASA TTASGAPLCD ICQERKGYFF ----- CLEDRAI  
 AT1G78600 CWACDEKI HA ANKLAGKHQR VPL----- S ASASSIPKCD ICQEASGFFF ----- CLQDRAL





421

|           |      |        |            |            |            |            |            |            |
|-----------|------|--------|------------|------------|------------|------------|------------|------------|
| AT1G60250 | CELC | VAS    | NSNAVVCPT  | HNQILCDS   | CDRMIH     | SHEDAVPPHS | RCKLCVICR  |            |
| AT1G49130 | TEEI | EDC    | YENNARHRLN | YENVIAAW   | DKQESP     | RDVKNTSSSF | QLVPPGIEEK |            |
| AT1G73870 | EASN | DKD    | RKTSFLRLD  | YGAVISAW   | DNHGSP     | WKTGIKPECM | LGGNTCLPHV | VGGYEKLMSS |
| AT1G25440 | VKVK | EEE    | HKNVLMRLN  | YDSVISTW   | GGQGP      | WSSGEPERD  | MDISGWPAFS | MVENGGESTH |
| AT1G68520 | GGIK | EEK    | KEKALMLRLD | YESVISTW   | GGQGIP     | WTARVPSEID | LDMVCFPHT  | MGESGAEAAH |
| AT3G07650 | SNDS | FMS    | SKTEPIICFA | SKPAHSNI   | SFSGVT     | GESSAGDFQE | CGASSSIQLS | GEP        |
| AT5G48250 | SADS | FMT    | CRTEPIICYS | SKPAHSNI   | SFSGIT     | GESNAGDFQD | CGASSMKQLS | REPO       |
| AT3G21880 | ASPP | GQQ    | MNINTGLQLP | LSPVLFQ    | IHPSLNIT   | GENNAADYQD | CGMSPGFIMS |            |
| AT4G15250 | YEDS | FKE    | ENNIGLPSLL | LPTLSGNVVP | NMSLSMSNLT | GESNATDYQD | CGISPGFLIG |            |
| AT2G47890 | LESG | LKW    | FDQODHEDFP | YCSLLKLN   | SEDEKP     | ENVDRESSVM | VPVSGCLNRC | EETVM      |
| AT1G28050 | GVKE | IKK    | DDYKRSTSGQ | VQPTKSES   | NNRPIT     | FGSEKGSNSS | SDLHFTEHIA | GTSC       |
| AT2G33500 | AFKE | SYQ    | QEDSVHSTST | KGQETS     | NNIPAA     | IHSHKSSNDS | CGLHCTEHIA | ITSNR      |
| AT1G68190 | DTIC | SDD    | DFQIPDIDL  | FRNFEEQF   | GADPEP     | IADSNVFFV  | SSLDKSHEMK |            |
| AT3G21150 | VSYA | SLA    | LAVETRPRAT | KRVFLAAA   | F          | WFGVKNTTTW | QNLKKVEDVT |            |
| AT5G15840 | IKYG | SSG    | THYNDNGSIN | HNAYISSM   | ETGVVP     | ESTACVTTAS | HPRTPKGTVE | Q          |
| AT3G02380 | INYG | FSSGAH | YNNNSLKDNL | HSASVSSM   | DISVVP     | ESTASDITVQ | HPRTTKETID |            |
| AT5G15850 | INCG | SWG    | ALRSSNGSL  | HMVNVSSM   | DLGVVP     | ESTTSDATVS | NPRSPKAVTD |            |
| AT5G57660 | FCRS | KLS    | AFTYPSQSVS | HSVSTSSI   | EYGVVP     | DGNTNNSVNR | STITSSTTGG |            |
| AT2G24790 | GVVP | VQN    | KLFLNEDYFN | FDLASAKI   | SOQGFN     | FINQTVSTRT | IDVPLVPESG | GV         |
| AT5G24930 | FTGG | SKG    | FTYGGGYNCI | SHSVSSSS   | MEVGVV     | PDGGSVADVS | YPYGGPATSG |            |
| AT4G27310 | EEDE | DEE    | YSDEDEDED  | EDGDDEEA   | ENQVVP     | WSAAAQVPPV | MSSSSSDGGS |            |
| AT5G54470 | SDED | EEE    | EEVENQVPPA | AVEQELPV   | VSSSSS     | VSSGEGDQVV | KRTRLDLDLN |            |
| AT3G21890 |      |        | DHD        | FHVVLPSV   | TTVGET     | TVENRSEQDN | HEVPLVFL   |            |
| AT4G15248 |      |        | DN         | FNVVLPEI   | RMIA       | RIEEHSSDHK | IPFVFL     |            |
| AT1G75540 | FSKS | GDD    | DGVLPYMEPE | DDNNTKRN   | NNNNNN     | NNNNTVSLPS | KNLGIWVPOI |            |
| AT4G39070 | GIEE | NYH    | HVSDSGSGSG | CTGISEY    | LMETLPG    | WRVEDLLEHP | SCVSYEDNII |            |
| AT1G06040 | FHFS | DI     | ESTDKKGQLD | LGAGELDW   | FSDMG      | FFGDQINDKA | LPAAEVPELS |            |
| AT2G31380 | FSYS | DL     | CSNKEKEQLD | LGELDW     | LAEMG      | LFGDQPDQEA | LPVAEVPELS |            |
| AT2G21320 | KASS | GRG    | QESNGNDHD  | HNMIDLNS   | NPQRVH     | EPGSHNQEEG | IDVNNANNHE |            |
| AT4G38960 | GEAN | GKI    | QDEMIDLNAN | PQRVHEPS   | SNNNGI     | DVNNENNHEP | AGLVPVGPFK |            |
| AT4G10240 | FSSE | TYQ    | IQSKVSLNSQ | YSSEETEA   |            | GNSGEIVHKN | PSVILSP    |            |
| AT1G78600 | ENNG | SSK    | ADTSRRGSD  | SSSMRSA    | E          | EDGEDNNCL  | GGETSWAVPQ |            |

491

|           |            |            |            |            |            |            |            |  |
|-----------|------------|------------|------------|------------|------------|------------|------------|--|
| AT1G60250 | PSRRFLIGG  | YQFNFPVHP  | PAAEGIPVTP | PTELPQODIN | YDYLDDVDDF | SWFGR      |            |  |
| AT1G49130 |            | RVRSERE    | ARVWRYRDKR | KNRLFEEKIR | YEVKVNADK  | RPRMKGRFVR | RSLAIDS    |  |
| AT1G73870 | DGSVTRQOGR | DGGGSDGERE | ARVLYREKR  | RTRLFSKKIR | YEVKLNAEQ  | RPRIKGRFVK | RTSLLT     |  |
| AT1G25440 | QKQYVGGCLP | SSGFGDGGRE | ARVSRYREKR | RTRLFSKKIR | YEVKLNAEK  | RPRMKGRFVK | RASLAAAASP |  |
| AT1G68520 | HNHFRGLGLH | LGDAGDGGRE | ARVSRYREKR | RTRLFSKKIR | YEVKLNAEK  | RPRMKGRFVK | RSSIGVAH   |  |
| AT3G07650 | PWYPTLQDN  | IACSHSVTRN | NAVMYRKEKK | KARKFDKVR  | YASRKARADV | RRRVKGRFVK | AGEAYDYDPL |  |
| AT5G48250 | PWCHPTAQDI | IASSHATRN  | NAVMYRKEKK | KARKFDKVR  | YVSRKERADV | RRRVKGRFVK | SGEAYDYDPM |  |
| AT3G21880 | EAPWETN    | FEVSCPQARN | EAKLRYKEKK | LKRSFGKQIR | YASRKARADT | RKRVKGRFVK | AGDSYDYDPS |  |
| AT4G15250 | DSPWESNV   | EVSFNPKLDR | EAKKRYKQKK | SKRMFGKQIR | YASRKARADT | RKRVKGRFVK | SGETFEYDPS |  |
| AT2G47890 | VPVITSTRSM | THEINSLERN | SALSRYKEKK | KSRRYEKHIR | YESRKVRAES | RTRIRGRFAK | AADP       |  |
| AT1G28050 | KTTRLVATKA | DLERLAQNRG | NAMQRYKEKR | KTRRYDKTIR | YESRKARADT | RLRVKGRFVK | ASEAPYP    |  |
| AT2G33500 | ATRLVAVTNA | DLEQMAQNRD | NAMQRYKEKK | KTRRYDKTIR | YETRKAET   | RLRVKGRFVK | ATDP       |  |
| AT1G68190 | TFSSSFNN   | PIFAPKPASS | TISFSSSETD | NPYSHSEVI  | SFCPSLSNNT | RQKVITRLKE | KKRARVEEKK |  |
| AT3G21150 |            | GVS        | AGMIRAVESK | LARAMTQQLR |            | RWRVDSEEGW | AENDNV     |  |
| AT5G15840 | QPDPASQMIT | VTQLSPMDRE | ARVLYREKR  | KTRKFEKTIR | YASRKAYAEI | RPRVNGRFAK | REIEAEEQGF |  |
| AT3G02380 | QLSGPPTQV  | VQQLTPMERE | ARVLYREKK  | KTRKFDKTIR | YASRKAYAEI | RPRIKGRFAK | RIET-EAEAE |  |
| AT5G15850 | QPPYPP     | AQMLSPRDRE | ARVLYREKK  | KMRKFEKTIR | YASRKAYAEK | RPRIKGRFAK | KKDV-DEEAN |  |
| AT5G57660 |            | DHQASSMDRE | ARVLYREKR  | KNRKFEKTIR | YASRKAYAES | RPRIKGRFAK | RTETENDDIF |  |
| AT2G24790 | TAEMTNTETP | AVQLSPAERE | ARVLYREKR  | KNRKFEKTIR | YASRKAYAEM | RPRIKGRFAK | RTDSRENDGG |  |
| AT5G24930 | ADPGTOR    | AVPLTSAERE | ARVMRYREKR | KNRKFEKTIR | YASRKAYAEM | RPRIKGRFAK | RTDTNESNDV |  |
| AT4G27310 |            | GGSV       | TKRTRARENS | DLICSDDEIG | SSSAQGSNYS | RPLKRSFAKS | TVVV       |  |
| AT5G54470 |            | LSDEENQ    | SRPLKRLSRD | EGLSRSTVVM | NSSIVKLGHG | RRKAEGCDTS | SSSSFY     |  |
| AT3G21890 |            |            |            |            |            |            |            |  |
| AT4G15248 |            |            |            |            |            |            |            |  |
| AT1G75540 | PQTLPSYP   | NQYFSQDNNI | QFGMYNKETS | PEVVSFAPIQ | NMKQOQONNK | RWYDDGGFTV | PQITPPPLSS |  |
| AT4G39070 |            | TNN        | NNSESYRVYD | GSSQFHQGF  | WDHKPFS    |            |            |  |
| AT1G06040 |            | VSHL       | GHVHSYK-PM | KSNVSHKKPR | FETRYDDDEE | EHFIVPDLG  |            |  |
| AT2G31380 |            | FSHL       | AHAHSYNRPM | KSNVFNKKQR | LEYRYDDEEE | HFLVPDLG   |            |  |
| AT2G21320 |            | HE         |            |            |            |            |            |  |
| AT4G38960 |            |            | RESE       | K          |            |            |            |  |
| AT4G10240 |            |            |            |            |            |            |            |  |
| AT1G78600 |            | IQSPPTA    | SGLNWPKHFH | HHSVFPDIT  | SSTPYTGSSP | NQRVGKRRRR | F          |  |

CCT

|           |             |           |
|-----------|-------------|-----------|
| AT1G60250 | -----       | -----     |
| AT1G49130 | -----       | -----     |
| AT1G73870 | -----       | -----     |
| AT1G25440 | LGVNY-----  | -----     |
| AT1G68520 | -----       | -----     |
| AT3G07650 | TPTRSY----- | -----     |
| AT5G48250 | SPTRSY----- | -----     |
| AT3G21880 | SPTTNN----- | -----     |
| AT4G15250 | LVM-----    | -----     |
| AT2G47890 | -----       | -----     |
| AT1G28050 | -----       | -----     |
| AT2G33500 | -----       | -----     |
| AT1G68190 | A-----      | -----     |
| AT3G21150 | -----       | -----     |
| AT5G15840 | NTMLMY---N  | TGYGIVPSF |
| AT3G02380 | EIFSTSLMSE  | TGYGIVPSF |
| AT5G15850 | QAFSTMITFD  | TGYGIVPSF |
| AT5G57660 | LSHVYASAAH  | AQYGVVPTF |
| AT2G24790 | DVGVYG----  | -GFGVVPSF |
| AT5G24930 | VGHGGI---F  | SGFGLVPTF |
| AT4G27310 | -----       | -----     |
| AT5G54470 | -----       | -----     |
| AT3G21890 | -----       | -----     |
| AT4G15248 | -----       | -----     |
| AT1G75540 | NKKFRSFW--  | -----     |
| AT4G39070 | -----       | -----     |
| AT1G06040 | -----       | -----     |
| AT2G31380 | -----       | -----     |
| AT2G21320 | -----       | -----     |
| AT4G38960 | -----       | -----     |
| AT4G10240 | -----       | -----     |
| AT1G78600 | -----       | -----     |
